1 **Detection of epistasis between *ACTN3* and *SNAP-25* with an insight**

2 **towards gymnastic aptitude identification**

3 ***ACTN3* – *SNAP-25* interaction in the context of athleticism**

4 **Łukasz Plóciennik<sup>1,6¶\*</sup>, Jan Zaucha<sup>2</sup>, Jan Maciej Zaucha<sup>3</sup>, Krzysztof Łukaszuk<sup>4</sup>,**  
5 **Marek Jóźwicki<sup>5</sup>, Magdalena Plóciennik<sup>6</sup>, Paweł Ciężczyk<sup>1</sup>**

6 **<sup>1</sup> Department of Physical Education, Academy of Physical Education and Sport in**  
7 **Gdansk, Gdansk, Pomorskie Voivodeship, Poland,**

8 **<sup>2</sup> Department of Bioinformatics, Wissenschaftszentrum Weihenstephan, Technische**  
9 **Universität München, Freising, Germany,**

10 **<sup>3</sup> Department of Haematology and Transplantation, Medical University of Gdansk,**  
11 **Gdansk, Pomorskie Voivodeship, Poland,**

12 **<sup>4</sup> Faculty of Health Sciences with Institute of Maritime and Tropical Medicine, Medical**  
13 **University of Gdansk, Gdansk, Pomorskie Voivodeship, Poland,**

14 **<sup>5</sup> Department of Architecture and Design, Academy of Fine Arts, Gdansk, Pomorskie**  
15 **Voivodeship, Poland,**

16 **<sup>6</sup> FitnessFitback, Pomorskie Voivodeship, Poland.**

17 **\*Corresponding Author: Łukasz Plóciennik ([lukaszplociennik.awf@wp.pl](mailto:lukaszplociennik.awf@wp.pl))**

18 **Abstract**

19 In this study, we performed an analysis of the impact of performance enhancing  
20 polymorphisms (PEPs) on gymnastic aptitude while considering epistatic effects. Seven PEPs  
21 (*rs1815739*, *rs8192678*, *rs4253778*, *rs6265*, *rs5443*, *rs1076560*, *rs362584*) were considered in  
22 a case (gymnasts) – control (sedentary individuals) setting. The study sample comprised of two  
23 athletes' sets: 27 elite (aged  $24.8 \pm 2.1$  years) and 46 sub-elite (aged  $19.7 \pm 2.4$  years) sportsmen  
24 as well as a control group of 245 sedentary individuals (aged  $22.5 \pm 2.1$  years). The DNA was

25 derived from saliva and PEP alleles were determined by PCR, RT-PCR. Following Multifactor  
26 Dimensionality Reduction, logistic regression models were built. The synergistic effect for  
27 *rs1815739 x rs362584* reached 5.43%. The *rs1815739 x rs362584* epistatic regression model  
28 exhibited a good fit to the data (Chi-squared = 33.758,  $p \approx 0$ ) achieving a significant  
29 improvement in sportsmen identification over naïve guessing. The area under the receiver  
30 operating characteristic curve was 0.715 (Z-score = 38.917,  $p \approx 0$ ). In contrast, the additive  
31 *ACTN3 – SNAP-25* logistic regression model has been verified as non-significant.

32 **We demonstrate that a gene involved in the differentiation of muscle architecture**  
33 **– *ACTN3* and a gene, which plays an important role in the nervous system – *SNAP-25***  
34 **interact.** From the perspective originally established by the Berlin Academy of Science in  
35 1751, the matter of communication between the brain and muscles via nerves adopts molecular  
36 manifestations. **Further in-vitro investigations are required to explain the molecular**  
37 **details of the *rs1815739 – rs362584* interaction.**

## 38 **Introduction**

39 By 1798, Luigi Galvani discovered two phenomena: muscle stimulation by extrinsic  
40 electricity and a genuine potential difference between the nerve and the muscle. These findings  
41 lead his successors to investigate the details of the electrical influence on nerve function in the  
42 context of muscle movement. By now, the scientific community has reached the molecular level  
43 of understanding the mechanisms involved and have already honed in on the genomic loci  
44 affecting athleticism. As a result, multiple single nucleotide polymorphisms (SNPs) have been  
45 implicated in affecting the aptitude for gymnastics. To move beyond simple SNP associations,  
46 genetic epistasis modeling may enhance the understanding of sports performance. Authors  
47 investigating genetic interactions typically rely only on genotype frequency odds ratios [1-3] or  
48 perform Genome-Wide Interaction Analyses (GWIA) employing tests visualized by pseudo-  
49 Manhattan plotting. So far, the matter of epistasis has been investigated for: (a) the Body Mass

50 Index (BMI) [4]; (b) physical activity in mice [5]; (c) medical disorders in clinical studies [6];  
51 in ischemic stroke susceptibility [7].

52 Variant interactions including synergy or redundancy have not yet been considered in  
53 the context of predicting athletic performance. [8-9]. Instead, the total genotype score (TGS)  
54 for distinguishing athletes has been calculated several times in different research projects  
55 [10-11]. Unfortunately, TGS models do not consider interactions between polymorphisms, i.e.,  
56 their synergy and redundancy [11]. The main strength of pure epistatic models is their potential  
57 for deciphering the genetic variation of predisposed athletes *ab initio*. Interestingly, ensemble-  
58 based classifiers [12], which are free of external attributes, have so far yielded better predictions  
59 than alternative approaches incorporating environmental effects into the model.

60 The genetic foundations of muscle performance are explored by mathematical  
61 modeling. While parametric techniques, such as logistic regression (LR) are limited in their  
62 ability to characterize the multivariate architecture of complex phenotypes, information theory  
63 provides a solution for quantifying the information gain between different statistical models of  
64 inference. The relative difference in Shannon entropy i.e. the Kullback-Leibler divergence (also  
65 known as information gain - IG) allows selecting the optimal approach for modeling the genetic  
66 effects on phenotype. Additionally, Multifactor Dimensionality Reduction (MDR), a non-  
67 parametric statistical technique allows detecting interactions between attributes of the model.  
68 In this work, we applied this method to detect epistasis in a set of candidate genes,  
69 Artistic gymnastics is one of many sport disciplines, which has not been extensively studied  
70 with regard to its genetic underpinnings. Notwithstanding the exact definition of the proportion  
71 of speed and strength to power output, gymnastics is definitely a highly polygenic anaerobic  
72 event, dependent on multiple, potentially interacting genetic variants.

73 The seven PEPs that were evaluated in this study include: (1) *rs1815739*, located within  
74 the *ACTN3* gene is involved in muscle contractions [13]; (2) *rs8192678*, located within the

75 *PPARGCIA* gene is responsible for the variability in power output; the substitution of glycine  
76 for serine at position 428 was reported to hinder performance in endurance activities [14];  
77 (3) *rs4253778*, located within the *PPARα* gene appears to be associated with the hypertrophic  
78 effect due to its effects on the cardiac and skeletal muscle substrate utilization [15]; (4) *rs6265*,  
79 located within the *BDNF-AS* gene is highly correlated with learning and the development of  
80 memory-related hippocampal neurons; (5) *rs5443*, located within the *GNB3* gene seems to be  
81 a candidate for explaining the variability in exercise phenotypes [16, 17]. Specifically, the  
82 proportion of the *TT* genotype is more pronounced in the top-level endurance athletes as  
83 compared with the sprinter group. Hence, G protein activity may affect the likelihood of  
84 becoming a top-level endurance athlete [17]; (6) *rs1076560*, located within the *DRD2* gene can  
85 predispose athletes to better performance in Australian Rules Football; it allows for specific  
86 talent identification and has been linked with motor coordination and learning [18];  
87 (7) *rs362584*, located within the *SNAP-25* gene was found to be associated with cognitive  
88 ability [19] and with the cognitive disorder [20]. Furthermore in 2015, Islamov et al. [21] have  
89 shown that *SNAP-25* is synthesized in the motor nerve endings, and affects motor neurons of  
90 the spinal cord. The aforementioned PEPs were analyzed with regard to epistasis in the context  
91 of gymnastics and evaluated in terms of their ability to discriminate between athletes and non-  
92 athletic individuals.

## 93 **Results**

### 94 **Quality control of SNPs called**

95 The minor allele frequency (MAF) for every candidate SNP was no less than 16.5%,  
96 which was the lowest value for the case of *rs4253788* (*PPARα*) – in the control group  
97 (S2 Supplementary Material, Table S2). All of the seven genetic polymorphisms were in Hardy-  
98 Weinberg equilibrium (HWE;  $H_0: \chi^2 \leq 6.635_{(0.01; 1)}$ ).

99

## 100 Models adjustment according to genetic markers

101 All SNPs under consideration were coded according to the values of the odds ratios for  
 102 heterozygote, homozygote of major allele and for homozygote of minor allele ( $odd_{Mm}$ ,  $odd_{MM}$ ,  
 103 and  $odd_{mm}$ ) extracted from contingency tables [22] (S3 Supplementary Material, p. 2). Data in  
 104 Table 1 indicates the odds ratios obtained for different genetic models.

105 **Table 1. Model adjustment according to examined SNPs.**

| SNP<br>OR        | <i>ACTN3</i>   | <i>PPARGC1A</i> | <i>PPAR<math>\alpha</math></i> | <i>BDNF-<br/>AS</i> | <i>GNB3</i> | <i>DRD2</i>    | <i>SNAP-<br/>25</i> |
|------------------|----------------|-----------------|--------------------------------|---------------------|-------------|----------------|---------------------|
| OR1 <sup>a</sup> | 1.043          | 1.225           | 0.475                          | 1.139               | 0.999       | 0.749          | 0.808               |
| OR2 <sup>b</sup> | 1.083          | 1.114           | 0.949                          | 0.990               | 1.309       | 0.570          | 1.319               |
| Model            | Multiplicative | Additive        | Dominant                       | Dominant            | Recessive   | Multiplicative | Over-<br>dominant   |

106 <sup>a</sup>OR1 = odds ratio for heterozygote (Mm)/odds ratio for homozygote of major allele (MM);

107 <sup>b</sup>OR2 = odds ratio for homozygote of minor allele (mm)/ odds ratio for heterozygote (Mm).

## 108 Entropy analysis

109 Next, the statistical significance has been calculated for each polymorphism's ability to  
 110 distinguish between the case (athletes) and control (non-athletes) groups. The strongest effect  
 111 observed for any single locus was for *PPARGC1A*. Its normalized information gain (IG)  
 112 reached the value of 0.0065 bits (0.65%). It was the largest univariate factor reducing entropy  
 113 with a borderline significance at  $p = 0.07$  (at  $\chi^2 = 5.317$ ). Table 2 presents IGs and p-values of  
 114 all genetic markers in the performed analysis:

115 **Table 2. Information gain values of studied genetic attributes.**

| Measures              | <i>ACTN3</i> | <i>PPARGC1A</i> | <i>PPAR<math>\alpha</math></i> | <i>BDNF-<br/>AS</i> | <i>GNB3</i> | <i>DRD2</i> | <i>SNAP-<br/>25</i> |
|-----------------------|--------------|-----------------|--------------------------------|---------------------|-------------|-------------|---------------------|
| IG <sup>a</sup> [bit] | 0.0017       | 0.0065          | 0.0043                         | 0.0017              | 0.0020      | 0.0023      | 0.0001              |
| $G^2$                 | 0.665        | 5.317           | 1.681                          | 0.665               | 0.782       | 0.899       | 0.039               |
| p-value               | 0.717        | 0.070           | 0.431                          | 0.717               | 0.676       | 0.638       | 0.981               |

116 <sup>a</sup> IG – information gain (S3 Supplementary Material, Eq. 3);

117 <sup>b</sup>  $G^2$  – G-square statistics (S3 Supplementary Material, Eq. 4).

118

## 119 **Multifactor dimensionality reduction**

120 Next, a genetic dendrogram has been constructed, using Rajski's distance, Ward's  
121 method and Lance and Williams recursive algorithm (S3 Supplementary Material, pp. 3-4).  
122 As a consequence, synergistic (red connections) and redundant effects have been determined  
123 (Figure 1). The analysis shows that polymorphisms are grouped into two clusters and two  
124 independent genetic pools of variants, namely: *PPAR $\alpha$* , *PPARGC1A* – *GNB3* and *BDNF*,  
125 *DRD2* – *ACTN3* – *SNAP-25*.

### 126 **Figure 1. A gene-gene interaction dendrogram in sports gymnastics performance.<sup>a</sup>**

127 <sup>a</sup>Orange line indicates weak positive interaction between clusters. Golden connections suggest the independence  
128 of *PPAR $\alpha$* , *BDNF*.

129 Epistasis between pairs of SNPs was evaluated in terms of the interaction information (I)  
130 between SNPs A and B in the context of class C:  $I(A; B; C)$ , with positive values corresponding  
131 to synergy while negative values indicating a redundancy (correlation) of the markers [23].  
132 The only strong synergistic effects were found between *ACTN3* – *SNAP-25* and *PPARGC1A* –  
133 *GNB3*, represented by 0.0543 bits of interaction information (5.43%) and 0.0364 bits (3.64%),  
134 respectively. However, little evidence corroborates other possible two-way interactions.  
135 A positive moderation has been detected for twenty out of twenty-one combinations.  
136 The highest values regard *PPARGC1A* – *SNAP-25* (0.0523 bits - 5.23%), *ACTN3* – *PPAR $\alpha$*   
137 (0.298 bits - 2.98%) and *GNB3* – *BDNF* (0.027 bits - 2.70%). The only negative interaction was  
138 between *SNAP-25* and *PPAR $\alpha$* ; this pair of SNPs diminishes 0.0001 bits of information about  
139 sports gymnastics. The results presented above support the alternative hypothesis stipulating  
140 the existence of a synergistic effect (e.g. for *ACTN3* and *SNAP-25*) in the set comprised of  
141 twenty-one possible two-way interactions between *rs1815739*, *rs8192678*, *rs4253778*, *rs6265*,  
142 *rs5443*, *rs1076560*, *rs362584*.

143 Next, a filtering technique (S3 Supplementary Material, Eq. 8) has been applied to  
144 identify the best epistatic framework. The optimal model has been obtained for the combination  
145 of *ACTN3* – *PPARGC1A* – *PPAR $\alpha$*  – *SNAP-25*. Its performance is summarized in table 3.

146 **Table 3. Test set results obtained for the *ACTN3* – *PPARGC1A* – *PPAR $\alpha$*  – *SNAP-25***  
147 **epistatic model selected to maximize balanced accuracy in 10-fold cross validation.**

| BAL. ACC. <sup>a</sup> | ACC.  | SENSIT. | SPECIF. | OR /CI                      | $\chi^2$ | $\chi^2$ p-val. | PRE. <sup>b</sup> | KAPPA | F <sup>c</sup> | CVC <sup>d</sup> |
|------------------------|-------|---------|---------|-----------------------------|----------|-----------------|-------------------|-------|----------------|------------------|
| 0.712                  | 0.692 | 0.75    | 0.674   | 6.211/<br>0.840 ;<br>45.938 | 3.652    | =<br>0.056      | 0.403             | 0.326 | 0.525          | 10/<br>10        |

148 <sup>a</sup> BAL. ACC. – balanced accuracy; <sup>b</sup> PRE. – test precision; <sup>c</sup> F – F1-statistics;

149 <sup>d</sup> CVC – cross validation consistency (count).

150 MDR analysis confirmed the statistical significance ( $p = 0.001$ ) of the model by comparing the  
151 value of the sign test against 1000 random permutations of the data, assuming no association  
152 under the null hypothesis. The model achieved a balanced accuracy (weighting case and control  
153 samples so as to simulate an equal sample size in each group) of 0.712. The odds ratio of  
154 positivity within the gymnasts' group relative to the controls is equal to 6.2. Interestingly,  
155 the p-value of the model estimated from the  $\chi^2$ -test achieved only borderline significance,  
156 confirming previous concerns about the reliability of the p-value obtained from the MDR  
157 analysis sign-test [24]. Nevertheless, the precision is above 40% and Cohen's Kappa at 0.326  
158 indicates a performance, which significantly surpasses naïve guessing. With regard to perfect  
159 precision and recall, the classifier is positioned in the middle of the achievable spectrum:  
160 F1-measure = 0.525. The training and whole data models are even more convincing  
161 (S2 Supplementary Material, Table S5, S6), since  $\chi^2$  p-values retained significance after  
162 Bonferroni's correction for multiple hypothesis testing. Nevertheless, we do not have definitive  
163 evidence that that the null hypothesis can be rejected.

164

165

## 166 **Logistic regression analysis**

167 For a simultaneous examination of the first and second order effects in the *ACTN3* –  
 168 *PPARGCIA* – *PPARα* – *SNAP-25* interaction, logistic regression with backward variable  
 169 selection has been adopted. Since this analysis yielded empty combinations, two-way  
 170 interactions were considered first. Contrasts between genotype categories were expressed in  
 171 terms of cross-partial derivatives. To ensure the interpretability of the results for unbalanced  
 172 classes, we used weighted effect coding (WEC). Interestingly, none of the other known  
 173 mathematical and statistical coding structures apart from WEC allows detecting pure genetic  
 174 interaction (S2 Supplementary Material, Table S1). In particular, such phenomenon has been  
 175 confirmed between *ACTN3* and *SNAP-25*, when setting the homogenous derived (alternative)  
 176 allele category as the reference (Table 4):

177 **Table 4. The full *ACTN3* – *SNAP-25* model with the derived allele reference category.**

| Constant / Genotypes                                     | <i>b</i><br>weights | CI 0.95<br>± | St.<br>errors | $\chi^2$ | p-values |
|----------------------------------------------------------|---------------------|--------------|---------------|----------|----------|
| Intercept                                                | -1.445              | 0.337        | 0.171         | 8.448    | 0.004**  |
| $b_{(ACTN3)}$ heterozygous (RX)                          | -0.082              | 0.313        | 0.159         | 0.518    | 0.471    |
| $b_{(ACTN3)}$ ancestral (RR)                             | 0.006               | 0.524        | 0.266         | 0.024    | 0.876    |
| $b_{(SNAP-25)}$ heterozygous (GA)                        | -0.064              | 0.388        | 0.197         | 0.326    | 0.568    |
| $b_{(SNAP-25)}$ ancestral GG                             | 0.089               | 0.372        | 0.189         | 0.473    | 0.492    |
| $b_{I(ACTN3),I(SNAP-25)}$ heterozygous<br>– heterozygous | -0.805              | 0.317        | 0.161         | 4.351    | 0.037*   |
| $b_{(ACTN3),(SNAP-25)}$ heterozygous<br>– ancestral      | 0.674               | 0.305        | 0.155         | 4.351    | 0.037*   |
| $b_{(ACTN3),(SNAP-25)}$ ancestral –<br>heterozygous      | 1.39                | 0.74         | 0.376         | 3.694    | 0.055*   |
| $b_{(ACTN3),(SNAP-25)}$ ancestral –<br>ancestral         | -0.876              | 0.386        | 0.196         | 4.479    | 0.034*   |

178  $b_i$  – SNP marginal effect;  $b_{ii}$  – 2-way G-G interaction product term, \*\* Significant at  $p \leq 0.01$ , \* significant at  $p \leq$   
 179 0.05 to second decimal place.

180 The baseline OR for being a highly qualified gymnast equals 0.24, when carrying the  
 181 most common genotype. Maximal log-likelihood for the estimated model totalled -133.857 with  
 182  $\chi^2$ -score of 34.344 (df = 8) and p-value  $\approx 0.000$ . Although the model explains genetic



183 foundations for sub-elite versus elite gymnasts' recognition in just 11% (pseudo  $R^2 = 0.114$ ),  
 184 we accept the global alternative hypothesis –  $H1_e$ , which states that at least one product term  
 185 between PEPs is significantly different than zero. Considering the WEC data arrangement,  
 186 the main effects of the model can be considered as non-significant being an order of magnitude  
 187 less than the interaction weights, which are all below or equal 0.05\*. Thus, individual beta  
 188 weights ( $b_i$ ) for *ACTN3* and *SNAP-25* are  $\approx 0$  and obeying statistical parsimony, we reject the  
 189 null hypothesis. Next, we performed logistic regression for *rs1815739* and *rs362584* without  
 190 first-order effects. Typically, in WEC, weights of regression coefficients do not change when  
 191 the reference category is switched. The same applies to maximal log-likelihood statistics.  
 192 Hence, we present different models (grouped according to reference genotype category)  
 193 of interactions between genotypes in Table 5:

194 **Table 5. The *ACTN3* – *SNAP-25* interaction models.**

| Constant / Genotypes                                                | $b$<br>weights | CI 0.95<br>± | St.<br>errors | $\chi^2$ | p-values            |
|---------------------------------------------------------------------|----------------|--------------|---------------|----------|---------------------|
| Intercept                                                           | -1.445         | 0.337        | 0.171         | 8.448    | 0.004**             |
| The model for the minor ( <i>XX, AA</i> ) allele reference category |                |              |               |          |                     |
| $b_{1,1}$ heterozygous – heterozygous                               | -0.805         | 0.317        | 0.161         | 4.351    | 0.037*              |
| $b_{1,2}$ heterozygous – ancestral                                  | 0.674          | 0.305        | 0.155         | 4.351    | 0.037*              |
| $b_{2,1}$ ancestral – heterozygous                                  | 1.39           | 0.74         | 0.376         | 3.694    | 0.055*              |
| $b_{2,2}$ ancestral – ancestral                                     | -0.876         | 0.386        | 0.196         | 4.479    | 0.034*              |
| The model for the heterozygous reference category                   |                |              |               |          |                     |
| $b_{1,1}$ derived – derived                                         | -1.377         | 0.854        | 0.434         | 3.171    | 0.075 <sup>†</sup>  |
| $b_{1,2}$ derived – ancestral                                       | -0.099         | 1.323        | 0.672         | 0.147    | 0.701 <sup>ns</sup> |
| $b_{2,1}$ ancestral – derived                                       | 2.089          | 1.726        | 0.877         | 2.382    | 0.123 <sup>‡</sup>  |
| $b_{1,2}$ ancestral – ancestral                                     | -0.876         | 0.386        | 0.196         | 4.479    | 0.034*              |
| The model for the ancestral ( <i>RR, GG</i> ) reference category    |                |              |               |          |                     |
| $b_{1,1}$ derived – derived                                         | -1.377         | 0.854        | 0.434         | 3.171    | 0.075 <sup>†</sup>  |
| $b_{1,2}$ derived – heterozygous                                    | 0.809          | 0.535        | 0.272         | 3.179    | 0.085 <sup>†</sup>  |
| $b_{2,1}$ heterozygous – derived                                    | 1.000          | 1.01         | 0.513         | 2.974    | 0.163 <sup>‡</sup>  |
| $b_{2,2}$ heterozygous – heterozygous                               | -0.805         | 0.317        | 0.161         | 4.351    | 0.037*              |

195  $b_{ii}$  – 2-way G-G interaction product term, \*\* Significant at  $p \leq 0.01$ , \* significant at  $p \leq 0.05$  to second decimal  
 196 place, <sup>†</sup> significant at  $p < 0.1$ , <sup>‡</sup> significant at  $p \leq 0.1$  to first decimal place, <sup>ns</sup> – non significant.

197 In agreement with previous results, all interaction effects from the model for  
198 *ACTN3* – *SNAP-25*, with the derived (minor allele) genotype set as the weighted reference  
199 category are significant. Moreover, G-G homogenous derived genotype, ancestral-derived and  
200 heterozygous (*XX,GA*) interaction genotypes also show considerable effects, at the edge of the  
201 p-value threshold for statistical significance. Maximal log-likelihood for the interaction model  
202 for the homogenous derived allele reference category has reached the value  
203 of -134.150. The  $\chi^2$  statistic was equal to 33.758 (df = 4) and pseudo  $R^2=0.112$  giving a p-value  
204 < 0.00001. According to the model, the pure minor allele (*XX,AA*) genotype has the strongest  
205 negative influence. Thus, it determines the context for the other interactions. In our analysis,  
206  $b_{1,1}$ ,  $b_{1,2}$ ,  $b_{2,1}$ ,  $b_{2,2}$  reached the p-value of 0.05 for the derived allele reference category  
207 (Table 5). The statistical significance was retained after applying Bonferroni's correction for  
208 multiple tests (p-value <sub>$\alpha/2$</sub>  = 0.001). **In the light of this fact, three-way and multi-way**  
209 **interactions have not been examined.**

210 Particularly noteworthy is that the pure epistatic logistic regression model achieved  
211 much better performance as compared with the additive-only model. When removing all  
212 second-order derivatives, the maximal log-likelihood for the *rs1815739* + *rs362584*  
213 combination is -150.688 and becomes non-significant with a p-value of 0.409.

214 The results obtained from the MDR and LR analyses revealed a remarkable crosstalk  
215 between *ACTN3* – *SNAP-25* polymorphisms. Disappointingly, the  $b_{heterozygous,heterozygous}$  and  
216  $b_{ancestral,ancestral}$  coefficients are attributed with negative weights; presumably, in both cases a low  
217 ratio of gymnasts to sedentary individuals (5/49 and 6/70, respectively) cause these effects  
218 (S2 Supplementary Material, Table S4). Nevertheless, homogenous minor allele (*XX,AA*)  
219 genotype hosts represent the lowest chance of classification to the gymnast group: 0.059.  
220 Taking this genotype as the reference, the modeled *ACTN3* – *SNAP-25* interaction effects allow  
221 rejecting the null hypothesis of no interaction.

222 Based on the training set, the classification performance for the interaction model  
223 without additive terms, with the *XX – AA* allele reference category and multiplicative entries  
224 arranged according to WEC achieved the area under the ROC curve (AUC-ROC) of 0.715  
225 (95% CI: 0.647 – 0.782; Z-score = 38.917, p-value  $\approx$  0.000) with a standard error (Se)  
226 of AUC-ROC = 0.034. The cut-off point was selected by maximizing the  
227 Youden index = TPF-PPF and was equal to 0.379 (Figure 2). Although the achieved  
228 classification accuracy offers good specificity and is already satisfactory to aid gymnasts'  
229 recognition, the Cohen's Kappa statistic is fair (27.2%) and F1-measure totals 0.498.

230 **Figure 2. The area under the curve (AUC-ROC) and cut-off point for the epistatic**  
231 ***rs1815739 \* rs362584* model based on the training dataset.**

232 When applied to the test hold-out dataset (n = 36), our classifier has correctly classified  
233 four athletes and fifteen sedentary individuals, yielding an accuracy of 52.78%.  
234 This is unsatisfactory for the purpose of supporting decision-making in sub-elite or elite  
235 gymnasts' identification. The observed AUC-ROC (0.715) and measure of Se AUC-ROC  
236 (0.034), despite being highly significant (p-value  $\approx$  0.000) has limited potential to confer these  
237 genetic variants as predictors for athlete's discrimination in the light of the obtained Kappa  
238 statistics and F1-measure. Further studies comprising larger samples may assert the status of  
239 these variants as informative for the task of gymnasts' identification. However, our results do  
240 not allow rejecting the null hypothesis.

241 Worth reporting are other insights shed by the LR and WEC data organization for the  
242 *ACTN3 – PPAR $\alpha$* , *PPARGC1A – SNAP-25*, *PPARGC1A – GNB3*, *GNB3 – BDNF* interactions.  
243 The contingency table for *ACTN3 – PPAR $\alpha$*  and *GNB3 – BDNF* exposed empty cell or singular  
244 representatives in genotype categories. Consequently, data were not processed any further for  
245 these models. Fortunately, the same did not apply, when  
246 *PPARGC1A – SNAP-25* and *PPARGC1A – GNB3* were considered. Both pairs of SNPs were

247 annotated with four statistically significant weights ( $p$ -value  $\leq 0.05$ ) for the same second-order  
248 product terms: *PPARGC1A* – *SNAP-25*:  $b_{GlyGly,GA}$  (*SerSer,GG* reference (ref.) genotype:  
249 favorable), *PPARGC1A* – *GNB3*:  $b_{GlyGly,CT}$  (*SerSer,CC* ref. group: favorable),  
250 *PPARGC1A* – *SNAP-25*:  $b_{GlyGly,GG}$  (*GlySer,GA* ref. heterozygous), *PPARGC1A* – *GNB3*:  
251  $b_{GlyGly,CC}$  (*GlySer,CT* heterozygous reference group), *PPARGC1A* – *SNAP-25*:  $b_{GlySer,GG}$  ,  
252  $b_{SerSer,GA}$  (*GlyGly,AA* ref. disfavorable), *PPARGC1A* – *GNB3*:  $b_{GlySer,CC}$  ,  $b_{SerSer,CT}$   
253 (*GlyGly,TT* reference group: disfavorable). The maximal log-likelihood value was -129.97 and  
254 -139.52, respectively. Nevertheless, the first-order effects remain insignificant for all possible  
255 pairwise combinations of SNPs. Further non-trivial effects of cross-partial G-G interactions  
256 obtained from eighteen other coding schemes applied to LR are in Supplementary Material S2.

## 257 **Discussion**

### 258 **The biological and sport science perspective**

259 The ultimate goal in sport is the athletic outcome, which correlates strongly with the  
260 level of physical fitness (with psychological effects playing a secondary role). An important  
261 theoretical aspect of predicting, which individuals are genetically predisposed to athleticism  
262 regards establishing which allele encoding schemes allow for the most faithful discrimination  
263 between athletically-gifted and ungifted individuals. Apart from fundamental, molecular types  
264 of genotype ordering, we evaluated nineteen classic (statistical and mathematical) notations to  
265 describe SNPs (list available in Supplementary Material S2). On the basis of planned contrasts  
266 [25], taking the trend and non-trend approaches [25], all possible ways of raw genetic data  
267 encoding have been processed to detect epistatic interactions. So far, there have been no studies  
268 in which genetic epistasis has been investigated using so many different encoding schemes.  
269 Most authors do not recognize this possibility and are reporting G-G interactions by means of  
270 LR but without considering cross-partial derivatives and using unspecified coding schemes  
271 [26-27]. Nonetheless, a growing body of literature has discussed ways of combining non-

272 parametric and parametric techniques with the goal of examining epistasis. A comprehensive  
273 attempt at investigating molecular interactions has been performed by Manuguerra et al. [28].  
274 Similar to our research, these authors have presented, apart from a measure of CVC and  
275 p-values, a prediction error percentage of low and-high risk instances for given G-G models  
276 and odds ratio reports to determine the probability of false-positive predictions. Besides, it is  
277 worth noting that Wu et al. [29] have performed an analysis considering relationships between  
278 genotypes internally but also with environmental variables. Unfortunately, no information has  
279 been given on the categorical coding scheme. Only a general linear assignment was presented,  
280 which enabled us to determine the class that was used as the reference. Also, Dasgupta et al.  
281 [30], inform on gene – environmental interaction odds ratios based on MLR without  
282 considering regression coefficients. Nevertheless the essential result summarizing protective  
283 and risk-conferring alleles has been delineated. Bottema et al. applied LR to confirm  
284 interactions identified by means of MDR. Of the epistatic interactions they identified, MDR  
285 indicated that most interactions were synergistic [31]. However, the negative gene – gene  
286 interactions in the logistic regression of two-locus models suggest that polymorphisms of these  
287 genes counteract the effect of one another.

288         In this study we provide multiple lines of evidence indicating an interaction between  
289 *ACTN3* and *SNAP-25*. To the best of our knowledge, no previous study has reported such a  
290 relationship. Furthermore, notwithstanding the context of gymnast recognition, no data  
291 suggesting any kind of interaction between *ACTN3* and *SNAP-25* is available in String-db [32].  
292 However, based on the outcome of the multidimensional stimulation therapy - MST  
293 intervention, neurophysiological studies have indicated the possibility of epistatic interactions  
294 between *APOE* and *SNAP-25* [33]. Interestingly, the interaction between *ACTN3* and *APOE*  
295 has been studied to explain the potential for exceptional longevity [34]. So far, with regard to

296 sports science, an epistasis of *ACE ID* and *ACTN3 R577X* polymorphisms has been determined,  
297 e.g. in swimmers – sprint and endurance performance [2].

298 In order to detect epistatic interactions Wei et al. [4] applied MLR and demonstrated  
299 two-way G-G effects affecting the body mass index (BMI) based on a genome-wide analysis.  
300 Specifically, interactions between the 19 shared epistatic genes (defined as these, which  
301 represent significant SNP interactions across cohorts) and those involving BMI candidate loci  
302 were tested across five populations ( $p$ -value  $< 5.0E-08$ ). Ultimately, eight replicated SNP pairs  
303 were found in at least one cohort ( $p$ -value  $< 0.05$ ) and no beta coefficients were detailed.

304 An interaction can also be recognized as product term, e.g. second-order parameter in  
305 logistic model under the assumption of linear coding. This technique has been used by  
306 Lee et al. [35] for testing the interaction between *EOT-2* and *CCR3* genes. The authors found  
307 that an *EOTAXIN-2* gene variant: *EOT-2+304C>A* (29L>I), was significantly associated with  
308 blood eosinophilia ( $p = 0.0087$ ) by the effect of *CCR3* = -0.68. Nevertheless, no information  
309 was presented on logistic regression main effects. Potentially, an analysis of first-order  
310 parameters in the LR model may be essential to verify pseudo  $R^2$  performance. In comparison  
311 all marginal weights of the full *ACTN3 – SNAP-25* model are insignificant and the benefit from  
312 applying the additive – multiplicative paradigm to gymnasts recognition is just 2%.  
313 Likewise, the subject of interaction has been studied for the *rs12722* and the *rs13946* in  
314 *COL5A1* gene to assess a risk of the anterior cruciate ligament rupture in soccer players and  
315 controls [36]. Unfortunately, with regard to sportsman diagnosis or prognosis no details have  
316 been given on classification accuracy.

317 The *ACTN3 – SNAP-25* interaction allows explaining 11% of the variance between  
318 high-level sports gymnasts. Bearing in mind that genetic factors typically explain between 20%  
319 - 80% variation in a wide variety of traits relevant to athletic performance [37], the G-G epistasis  
320 detailed in this paper should not be neglected in future investigations.

## 321 **Methodological aspects**

322         Several details of our analysis deserve particular attention. Firstly, considering the  
323 multiplicative – over-dominant scheme of epistasis between *ACTN3* and *SNAP-25*, the  
324 theoretically desirable ancestral – ancestral ( $b_{ancestral,ancestral}$ ) or heterozygous – heterozygous  
325 ( $b_{heterozygous,heterozygous}$ ) genotype carries a negative value. However, assuming disordinal  
326 interactions, there may be a region of non-significance [38], wherein there is a range of values  
327 for which no epistatic effect occurs. Secondly, possible signs change might occur for non-linear  
328 models even in the absence of an interaction [39]. These exist rational explanations for our  
329 results concerning  $b_{heterozygous,heterozygous}$  and  $b_{ancestral,ancestral}$ . The third aspect concerns the data  
330 distribution. There were very few instances of gymnasts, who carried two heterozygous or  
331 dominant alleles for *ACTN3* and *SNAP-25*. An additional corroboration of our results is the fact  
332 that the *gene \* gene* interaction at the *rs1815739* and *rs362584* loci was detected by means of  
333 both: non-parametric and parametric tests. Here, after correction for multiple testing, statistical  
334 significance was far below the restrictive threshold. Finally, in terms of probability calculus, an  
335 additive only model: *ACTN3* + *SNAP-25* is not significant. **Consequently, our results have**  
336 **interesting implications, which explain the underlying molecular details coordinating the**  
337 **neuromuscular system, which has been first studied by Luigi Galvani in the 18<sup>th</sup> century.**  
338 Finally, we would like to stress that further studies concerning the *ACTN3 \* SNAP-25*  
339 interactions should be conducted while considering two other levels of epistasis (suppressive,  
340 co-suppressive) [40].

## 341 **The gymnasts identification context**

342         Despite significant results corroborating the identified genetic interaction, the resultant  
343 model for discriminating between athletes and non-athletes does not yet allow for making fully  
344 reliable predictions (Figure 2). In terms of prognosis, even a single genotype of a genetic  
345 polymorphism may be introduced as a biomarker of prevalence risk, like has been done for

346 ischemic stroke [7]. Similarly, in our opinion, the *PPARGCIA* gene (Table 2) might be  
347 considered for diagnostic purposes. However, its usefulness in the context of gymnasts  
348 recognition has not been so far confirmed. Finally, we also observed a nominal statistical G\*G  
349 partial interaction of *PPARGCIA* – *SNAP-25* and *PPARGCIA* – *GNB3* based on the gymnast  
350 status, which is interesting in the context of the studies that have associated these loci with  
351 effects relating to sport [14, 16-17, 19-21].

## 352 **Conclusions**

353 Our analysis of seven PEPs (*ACTN3*, *PPARGCIA*, *PPAR $\alpha$* , *BDNF-AS*, *DRD2*, *GNB3*,  
354 *SNAP-2*), allows us to state with 93% confidence that the *rs819267* provides as much as 0.0065  
355 bit of information on sports gymnastics. The molecular dendrogram of gymnastics aptitude  
356 indicated the strongest connection between *rs1815739* and *rs362584*: 5.43% with a significant  
357 threshold of  $\approx 0.000$ , when the homogenous derived allele category is set as the reference group.  
358 According to the findings, the best MDR epistatic model of sports gymnastics comprises of:  
359 *ACTN3* – *PPARGCIA* – *PPAR $\alpha$*  – *SNAP-25* (the cross validation consistency equals 100%).  
360 Manifestly, when considering all pairwise combinations between *ACTN3*, *PPARGCIA*,  
361 *PPAR $\alpha$* , *BDNF-AS*, *DRD2*, *GNB3*, *SNAP-25*, the results confirm that only the second order  
362 terms of sports gymnastics epistatic models are non-zero. Lastly, out of the set of *ACTN3*,  
363 *PPARGCIA*, *PPAR $\alpha$* , *BDNF-AS*, *DRD2*, *GNB3* and *SNAP-25* genes, the most informative  
364 epistatic classifier – *rs1815739*  $\times$  *rs362584* is statistically significant in the context of sportsman  
365 recognition.

## 366 **Materials and Methods**

### 367 **Ethic Committee**

368 The study was approved by The Pomeranian Medical University Ethics Committee,  
369 Poland (Approval number 09/KB/IV/2011). Research procedures were run according to the  
370 World Medical Association Declaration of Helsinki. An informed consent form was completed



371 by each participant or obtained from a parent / legal guardian (in the case of minors) in  
372 accordance with current Polish, Italian and Lithuanian law.

### 373 **Participants**

374 A Seventy three sportsman and two hundred forty five sedentary, non-active individuals  
375 met the inclusion criteria and comprised a group for this study. They had no records of  
376 metabolic, cardiovascular diseases or musculoskeletal injuries. The subjects were non-smokers  
377 and did not take any medications. The cohort participants volunteered in Poland, Italy,  
378 Lithuania between 2012 and 2017. All participants were unrelated European men (59.4%)  
379 or women (40.6%), and all of European descent (as self-reported) for  $\geq 3$  generations.  
380 Therefore, the influence of an ethnically-induced genetic skew has been minimized and  
381 the potential population stratification issues have been controlled (S1 Study Protocol, p. 4, 5).  
382 The study sample included 34 females and 39 males in two homogenous athletes groups – elite  
383 ( $25.2 \pm 2.8$  years old):  $n_{\text{gymnasts (1,1)}} = 18$  (24.7%), who had competed at an international level  
384 (European or World Championships or Olympic Games) and sub-elite – national-level athletes  
385 ( $19.4 \pm 3.5$  years old):  $n_{\text{gymnasts (1,2)}} = 55$  (75.3%), who performed sports gymnastics at a national  
386 level only. Contestants were classified according to the highest-level contest they had appeared  
387 in. The gymnasts were only included if they had never been tested positive by an anti-doping  
388 agency. A control group of healthy individuals  $n_{\text{controls}} = 245$ ; 150 males and 95 females;  $22.6$   
389  $\pm 2.5$  years old was also selected from the Polish, Italian and Lithuanian population  
390 (college students) with no background in the sport.

391 Controls were matched to gymnasts in ca. 1:4 ratio; adjustment consideration has been  
392 specified in the Study Protocol (S1).

393

394

395

## 396 **Methods, aims and hypotheses**

397 In the paper, a quantitative approach to analyses has been conducted. The methods of  
398 observation and diagnostic survey were used. To gather the molecular data, PCR and RT-PCR  
399 techniques have been applied.

400 The goals of the research were: (a) **to measure the magnitude of informative entropy**  
401 **of sport PEPs in artistic gymnastics with subsequent analysis of synergistic effects or**  
402 **redundancy between genetic variants;** (b) **to determine marginal effects and cross-partial**  
403 **derivatives at the level of 2-way gene-gene interactions;** and (c) **to investigate quality**  
404 **measures of MDR and logistic regression epistatic models for athletes recognition.**

405 The aims implicate the following questions: (a) How much information will be gained  
406 on artistic gymnastics after quantifying Shannon entropy of a single genetic variant?  
407 (b) Does at least one two-attribute synergistic or redundant effect exist between sport  
408 performance enhancing polymorphisms? (c) Will the best MDR epistatic model of sports  
409 gymnastics achieve an outcome greater than 55% in cross validation consistency test?  
410 (d) For which combination of gene-gene models are the first and second order terms different  
411 than zero? (e) Are genetic classifiers statistically significant in the context of sportsman  
412 recognition? These questions concern six alternative hypotheses  $H_1$ :

413 (a)  $H(S_{max}) < 1$ ; (b)  $\bigvee_{IG(A;B;C) \in IG(A;B;C)} I(A; B; C) \neq 0$ ; (c)  $CVC_{max} > 55\%$ ;  
414 (d)  $\bigvee_{b_i \in b_i} b_i \neq 0$  and; (e)  $\bigvee_{b_{ii} \in b_{ii}} b_{ii} \neq 0$  when two SNPs are investigated in 2-way interaction  
415 model; (f)  $AUC_i > 0,7$  for  $i = 1, \dots, m$ ;  $i^{\text{th}}$  Kappa statistic  $> 0.6$ ,

416 where:

417  $H(S_{max})$  is the maximal value of Shannon entropy in the set of genetic polymorphisms  
418  $j = 1, \dots, k$ ,  $IG$  is the information gain;  $I(A; B; C)$  is the vector of multiple mutual information  
419 results from all possible combinations in the analysis;  $CVC_{max}$  – the highest value obtained in  
420 cross-validation consistency (count) for epistatic models;  $b_i$  – SNP marginal effect;  $b_{ii}$  is

421 a 2-way G-G interaction product term;  $AUC_i$  – area under the curve for model  $i$ ;  
422  $\forall_{IG(A;B;C) \in IG(A;B;C)}$  is the existential quantifier.

### 423 **Biological sample collection and DNA extraction**

424 The buccal cells donated by the participants were acquired using the Oragene – DNA  
425 isolation kit (DNA Genotek, Kanata, ON, Canada). The subjects abstained from drinking, and  
426 eating for 2 hours prior to saliva collection. Each participant was asked to perform a 2-min  
427 mouth rinse with water 30 min before retrieving the DNA sample. Samples were collected by  
428 passive drooling in sterile 50 ml tubes. Tubes were filled up to 4 ml, then vigorously mixed and  
429 transported to a laboratory for further processing. All samples were stored in the same  
430 conditions at  $-25^{\circ}\text{C}$  until subsequent steps were performed.

431 DNA was extracted according to the producer’s protocol. Briefly, the DNA material  
432 located in the Oragene tubes was incubated at  $50^{\circ}\text{C}$  overnight. Afterward, the probes were  
433 opened and divided into four equal parts. Each one was treated with 40  $\mu\text{l}$  of buffer solution  
434 supplied by the manufacturer. After a period of 10 minutes of ice incubation, centrifugation for  
435 3 minutes at 13,000 rpm was performed. The resulting supernatant (DNA) was assessed  
436 for both purity and integrity by using spectrometric and electrophoretic methods, respectively.

### 437 **Determination of genotypes**

438 DNA isolation and genotyping were performed in the molecular laboratory of Gdansk  
439 University of Physical Education and Sport, Poland. The genotyping error was assessed as 1%,  
440 while the call rate was above 95%. Details on PEPs genotyping can be verified in  
441 Supplementary Material – S1. Briefly, six gene variants (*ACTN3* – *rs1815739*, *PPARGC1A* –  
442 *rs8192678*, *PPAR $\alpha$*  – *rs4253778*, *BDNF-AS* – *rs6265*, *GNB3* – *rs5443*, *DRD2* – *rs1076560*)  
443 were assessed by PCR. In accordance with [2], amplification was performed in a total volume  
444 of 10  $\mu\text{l}$  PCR reaction mix containing 1.5 mM  $\text{MgCl}_2$ , 0.75 nM of each deoxynucleoside  
445 triphosphate – dNTP (Novazym, Poland), 4 pM of specific primer (Genomed, Poland ) in TE

446 (pH= 8.0; Thermo Fisher Scientific), 0.5 U DNA recombinant Taq polymerase in buffer  
447 (pH= 8.0; Sigma, Germany), 1x PCR buffer (pH=8.7; Sigma, Germany) and 1 µl (30–50 ng)  
448 of template DNA (isolate). The thermal-time PCR amplification cycling profile conditions  
449 consisted of 10 min of preincubation at 95°C (activation of the Taq DNA polymerase), followed  
450 by 40 cycles of denaturation at 95°C for 15 s, and primer annealing, and extension for 1 min at  
451 60°C, followed by a final elongation cycle at 72 °C for 3 min. The PCR fragments were  
452 subsequently digested with the appropriate restriction enzyme. The PCR products were  
453 separated by electrophoresis at 80mV on a 2% agarose gel, stained with ethidium bromide  
454 (250ng / ml), and visualized in UV light. The *SNAP-25* (*rs362584*) was genotyped in two  
455 replicates with TaqMan fluorescent oligonucleotide probes. Likewise, following [41], a BioRad  
456 CFX96 Touch™ RT-PCR Detection System in tandem with the Bio-Rad CFX Manager  
457 Software was used to detect the fluorescent signals and to produce a graphical representation  
458 which allowed for A / G allelic discrimination. Freshly purified / sterile water was used as  
459 a negative control for PCR.

## 460 **Statistical analyses**

461 From 318 observations, 36 (roughly 10%) of instances were included into the test set  
462 (hold-out dataset). Minor allele frequencies were computed for each of the seven SNPs and  
463 Hardy-Weinberg equilibrium was tested. In the standard – linear approach, genotypes were  
464 coded as ‘1’: potentially unfavorable for strength / power sports activities, ‘2’: heterozygotes,  
465 or ‘3’ (S2 Supplementary Material, p. 8). Next, the most commonly used six subject-level gene  
466 models including: recessive, multiplicative, additive / harmonic, dominant, and over-dominant  
467 models [22] were computed to select the best one to the given data distribution of each SNP.  
468 After quality control of alleles and model selection, the information gain (IG) of every SNP  
469 was computed with standard coding and with the adjustment for the optimal genetic model.

470 Next, the Multifactor Dimensionality Reduction (MDR) and logistic regression algorithms were  
471 applied.

472 All statistical analyses were run in MS Excel on a standard PC and in MDR program  
473 available on the Internet (<https://www.multifactor dimensionality reduction.org/>).  
474 The threshold for statistical significance was set to p-value  $\leq 0.05$ , with two-sided Bonferroni  
475 correction for multiple comparisons. Formulae used for data processing have been compiled in  
476 Supplementary Material (S3 Theoretical Background – Data Analysis), for further inspection.

## 477 **Conflicts of Interest**

478 The authors declare that they have no conflict of interest.

## 479 **References**

- 480 1. Eynon N, Alves AJ, Sagiv M, Yamin C, Sagiv M, Meckel Y. Interaction between SNPs  
481 in the NRF2 gene and elite endurance performance. *Physiol Genomics*. 2010; 41(1): 78-  
482 81. doi:10.1152/physiolgenomics.00199.2009.
- 483 2. Grenda A, Leońska-Duniec A, Kaczmarczyk M, Ficek K, Król P, Cięszczyk P.  
484 Interaction Between ACE I/D and ACTN3 R557X Polymorphisms in Polish Competitive  
485 Swimmers. *J Hum Kinet*. 2014; 42: 127-36. doi:10.2478/hukin-2014-0067.
- 486 3. O'Connell K, Knight H, Ficek K, Leonska-Duniec A, Maciejewska-Karlowska A,  
487 Sawczuk M, et al. Interactions between collagen gene variants and risk of anterior  
488 cruciate ligament rupture. *Int J Sports Sci*. 2015; 15(4): 341-350. doi:  
489 10.1080/17461391.2014.936324.
- 490 4. Wei W-H, Hemani G, Gyenesei A, Vitart V, Navarro1 P, Hayward C, et al. Genome-wide  
491 analysis of epistasis in body mass index using multiple human populations. *Eur J Hum*  
492 *Genet*. 2012; 20(8): 857-862. doi: 10.1038/ejhg.2012.17.
- 493 5. Leamy LJ, Pomp D, Lightfoot JT. An epistatic genetic basis for physical activity traits in  
494 mice. *J Hered*. 2008; 99(6): 639-46. doi:10.1093/jhered/esn045.

- 495 6. Hsu P-C, Yang U-C, Shih K-H, Liu C-M, Liu Y-L, Hwu H-G.  
496 A protein interaction based model for schizophrenia study. *BMC Bioinform.* 2008; 9  
497 (Suppl 12): S23: 1-9. doi:10.1186/1471-2105-9-S12-S23.
- 498 7. Liu, D., Liu, L., Song, Z., Liu, J., & Hou, D. (2017). Genetic Variations of Oxidative  
499 Stress Related Genes ALOX5, ALOX5AP and MPO Modulate Ischemic Stroke  
500 Susceptibility Through Main Effects and Epistatic Interactions in a Chinese Population.  
501 *Cell Physiol Biochem.* 43, 1588 – 1602. doi.org/10.1159/000482023.
- 502 8. Ruiz JR, Arteta D, Buxens A, Artieda M, Gómez-Gallego F, Santiago C, et al. Can we  
503 identify a power-oriented polygenic profile? *J Appl Physiol.* 2010 a; 108(3): 561-566.  
504 doi: 10.1152/jappphysiol.01242.2009.
- 505 9. Hughes DC, Day SH, Ahmetov II, Williams AG. Genetic of strength and power:  
506 polygenic profile similarity limits skeletal muscle performance. *J Sports Sci.* 2011;  
507 29(13): 1425-34. doi: 10.1080/02640414.2011.597773.
- 508 10. Williams AG, Folland JP. Similarity of polygenic profiles limits the potential for elite  
509 human physical performance. *J Physiol.* 2008; 586(1): 113-21.  
510 doi:10.1113/jphysiol.2007.141887.
- 511 11. Grealy R, Herruer J, Smith CLE, Hiller D, Haseler LJ, Griffiths LR. Evaluation of a 7-  
512 Gene Genetic Profile for Athletic Endurance Phenotype in Ironman Championship  
513 Triathletes. *PloS One.* 2015; 10(12): e145171: 1-20.  
514 doi: 10.1371/journal.pone.0145171.
- 515 12. Sun YV. Multigenic Modeling of Complex Disease by Random Forest. In: Moore JH,  
516 Dunlap JC, editors. *Computational Methods for Genetics of Complex Traits.* San Diego,  
517 CA: Elsevier; 2010. pp. 73-97.
- 518 13. Ben-Zaken S, Eliakim A, Nemet D, Meckel Y. Genetic Variability Among Power  
519 Athletes: The Stronger vs. the Faster. *J Strength Cond Res.* 2019; 33(6): 1505-1511. doi:

- 520 10.1519/JSC.0000000000001356.
- 521 14. Tharabenjasin P, Pabalan N, Jarjanazi H. Association of PPARGC1A Gly428Ser  
522 (rs8192678) polymorphism with potential for athletic ability and sports performance: A  
523 meta-analysis. PLoS ONE. 2019; 14(1): e0200967: 1-18.  
524 doi. org/10.1371/journal.pone.0200967.
- 525 15. Ahmetov II, Fedotovskaya ON. Sports genomics: Current state of knowledge and future  
526 directions. CMEP. 2012; 1(1): 1-24. doi:10.7457/cmep.v1i1.e1.
- 527 16. Ruiz J, Eynon N, Meckel Y, Fiuza-Luces C, Santiago C, Gómez-Gallego F, et al. GNB3  
528 C825T Polymorphism and Elite Athletic Status: A Replication Study with Two Ethnic  
529 Groups. Int J Sports Med. 2010 b; 32:151-153.  
530 doi: 10.1055/s-0030-1268438.
- 531 17. Eynon N, Oliveira J, Meckel Y, Sagiv M, Yamin C, Sagiv M, et al. The Guanine  
532 Nucleotide Binding Protein Beta Polypeptide 3 Gene C825T Polymorphism Is Associated  
533 With Elite Endurance Athletes. Exp Physiol. 2009; 94: 344-349.
- 534 18. Jacob Y, Chivers P, Anderton RS. Genetic predictors of match performance in sub-elite  
535 Australian football players: A pilot study. J Exerc Sci Fit. 2019; 17(2): 41-46. doi:  
536 10.1016/j.jesf.2018.10.007. Epub 2018 Nov 1.
- 537 19. Gosso MF, De Geus EJC, van Belzen MJ, Polderman TJC, Heutink P, Boomsma DI, et  
538 al. The SNAP-25 Gene Is Associated With Cognitive Ability: Evidence From a Family-  
539 Based Study In Two Independent Dutch Cohorts. Mol Psychiatr. 2006; 11(9): 878-886.  
540 doi: 10.1038/sj.mp.4001868.
- 541 20. Liu Y-S, Dai X, Wu W, Yuan F-F, Gu X, Chen J-G, et al. The Association of SNAP25  
542 Gene Polymorphisms in Attention Deficit / Hyperactivity Disorder: A Systematic Review  
543 and Meta-Analysis. Mol Neurobiol. 2017; 54(3): 2189-2200. doi: 10.1007/s12035-016-  
544 9810-9.

- 545 21. Islamov RR, Samigullin DV, Rizvanov AA, Bondarenko NI, Nikolskiy EE.  
546 Synaptosome-associated protein 25 (SNAP25) synthesis in terminal buttons of mouse  
547 motor neuron. Dokl Biochem Biophys. 2015; 464:  
548 272-274. doi: 10.1134/S1607672915050026. Epub 2015 Oct 31.
- 549 22. Horita N, Kaneko T. Genetic model selection for a case-control study and a meta-analysis.  
550 Meta Gene. 2015; 5: 1-8.
- 551 23. Hu T, Chen Y, Kiralis JW, Collins RL, Wejse Ch, Sirugo G, et al. An information-gain  
552 approach to detecting three-way epistatic interactions in genetic association studies. J Am  
553 Med Inform Assoc. 2013; 20: 630-636. doi: 10.1136/amiajnl-2012-00152.
- 554 24. Milne RL, Fagerholm R, Nevanlinna H, Benítez J. The importance of replication in gene–  
555 gene interaction studies: multifactor dimensionality reduction applied to a two-stage  
556 breast cancer case-control study. Carcinogenesis. 2008; 29(6): 1215-1218. doi:  
557 10.1093/carcin/bgn120.
- 558 25. Sundström S. Coding in Multiple Regression Analysis: A Review of Popular Coding  
559 Techniques. U.U.D.M. Project Report. Uppsala University. 2010. Available from:  
560 <http://uu.diva-portal.org/smash/get/diva2:325460/FULLTEXT01.pdf>
- 561 26. Lekman M, Hössjer O, Andrews P, Källberg H, Uvehag D, Charney D, et al. The genetic  
562 interacting landscape of 63 candidate genes in Major Depressive Disorder: an explorative  
563 study. BioData Min. 2014; 7(19): 1-18. doi: 10.1186/1756-0381-7-19.
- 564 27. Jyothi KU, Reddy BM. Gene–gene and gene–environment interactions in the etiology of  
565 type 2 diabetes mellitus in the population of Hyderabad, India. Meta Gene. 2015; 5: 9-20.  
566 doi: 10.1016/j.mgene.2015.05.001.
- 567 28. Manuguerra M, Matullo G, Veglia F, Autrup H, Dunning AM, Garte S, et al. Multifactor  
568 dimensionality reduction applied to a large prospective investigation on gene-gene and  
569 gene-environment interactions. Carcinogenesis. 2007; 28(2): 414-22. doi:



- 570        10.1093/carcin/bgl159.
- 571    29.    Wu Y, Zhang L, Liu L, Zhang Y, Zhao Z, Liu X, et al. A multifactor dimensionality  
572        reduction-logistic regression model of gene polymorphisms and an environmental  
573        interaction analysis in cancer research. *Asian Pac J Cancer Prev.* 2011; 12(11): 2887-  
574        2892.
- 575    30.    Dasgupta S, Reddy BM. The role of epistasis in the etiology of Polycystic Ovary  
576        Syndrome among Indian women: SNP-SNP and SNP-environment interactions. *Ann*  
577        *Hum Genet.* 2013; 77(4): 288-298. doi: 10.1111/ahg.12020.
- 578    31.    Bottema RW, Postma DS, Reijmerink NE, Thijs C, Stelma, FF, Smit HA, et al. Interaction  
579        of T-cell and antigen presenting cell co-stimulatory genes in childhood IgE. *Eur Respir J.*  
580        2010; 35(1): 54-63. doi: 10.1183/09031936.00018909.
- 581    32.    Szklarczyk D, Gable AL, Lyon D, Junge A, Wyder S, Huerta-Cepas J, et al. STRING  
582        v11: protein–protein association network with increased coverage, supporting functional  
583        discovery in genome-wide experimental datasets. *Nucleic Acids Res.* 2019; 47  
584        (D1):D607-D613: doi: 10.1093/nar/gky1131.
- 585    33.    Guerini FR, Farina E, Costa AS, Baglio F, Saibene FL, Margaritella N. et al. ApoE and  
586        SNAP-25 Polymorphisms Predict the Outcome of Multidimensional Stimulation Therapy  
587        Rehabilitation in Alzheimer’s Disease. *Neurorehab Neural Re.* 2016; 30(9): 883-893. doi:  
588        10.1177/1545968316642523.
- 589    34.    Fuku N, Díaz-Peña R, Arai Y, Abe Y, Zempo H, Naito H. et al. Epistasis, physical  
590        capacity-related genes and exceptional longevity: *FNDC5* gene interactions with  
591        candidate genes *FOXOA3* and *APOE*. *BMC Genomics.* 2017; 18(Suppl 8): 803: 126-131.  
592        doi: 10.1186/s12864-017-4194.
- 593    35.    Lee J-H, Jang A-S, Park S-W, Kim D-J, Park C-S. Gene-Gene Interaction Between *CCR3*  
594        and *Eotaxin* Genes: The Relationship With Blood Eosinophilia in Asthma. *Allergy*

- 595 Asthma Immunol Res. 2014; 6(1); 55-60. doi: 10.4168/air.2014.6.1.55.
- 596 36. Lulińska-Kuklik E, Rahim M, Domańska-Senderowska D, Ficek K, Michałowska-  
597 Sawczyn M, Moska W, et al. Interactions between *COL5A1* Gene and Risk of the Anterior  
598 Cruciate Ligament Rupture. J Hum Kinet. 2018; 62: 65-71. doi: 10.1515/hukin-2017-  
599 0177.
- 600 37. MacArthur, DG, North KN. ACTN3: A Genetic Influence on Muscle Function and  
601 Athletic Performance. Exerc Sport Sci Rev. 2007; 35(1):  
602 30-34. doi: 10.1097/JES.0b013e31802d8874.
- 603 38. Jakulin A. Attribute Interactions in Machine Learning. M.Sc. Thesis. Second Edition.  
604 University of Ljubljana. 2003. p. 37. Available from:  
605 [http://stat.columbia.edu/~jakulin/Int/interactions\\_full.pdf](http://stat.columbia.edu/~jakulin/Int/interactions_full.pdf)
- 606 39. Ai Ch, Norton EC. Interaction terms in logit and probit models. Econ Lett. 2003; 80(1):  
607 123-129. doi: 10.1016/S0165-1765(03)00032-6.
- 608 40. Kim J, Yum S, Kang C, Kang S-J. Gene-gene interactions in gastrointestinal cancer  
609 susceptibility. Oncotarget. 2016; 7(41): 67612-67625. doi:10.18632/oncotarget.11701.
- 610 41. Leońska-Duniec A, Jastrzębski Z, Jażdżewska A, Moska W, Lulińska-Kuklik E, Sawczuk  
611 M, et al. Individual Responsiveness to Exercise-Induced Fat Loss and Improvement of  
612 Metabolic Profile in Young Women is Associated with Polymorphisms of Adrenergic  
613 Receptor Genes. J Sport Sci Med. 2018; 17(1): 134-144.

## 614 **Supporting information**

615 **S1 Study Protocol.** This protocol has been provided by the authors to give readers additional  
616 information about the research work (.docx).

617 **S2 Supplementary Material 1.** This work contains all supplemental text, figures, and tables.  
618 (.docx).

619 **S3 Supplementary Material 2.** Theoretical Background - Data Analysis.

620 **S4 Data Input.**

621 **S5 Author Summary.**

622 **S6 Figure 1.**

623 **S7 Figure 2.**

624 **S8 Graphical Abstract.**

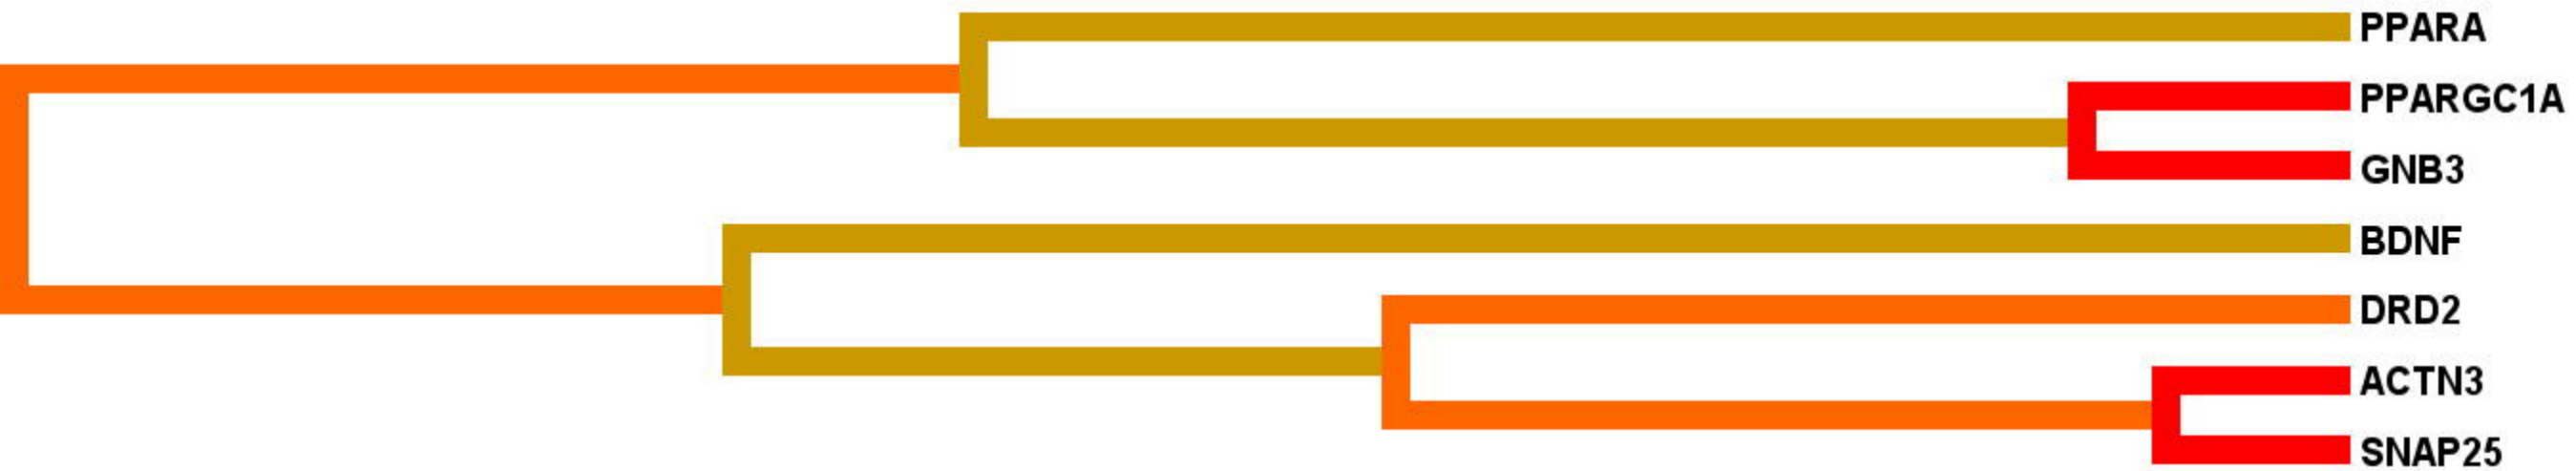

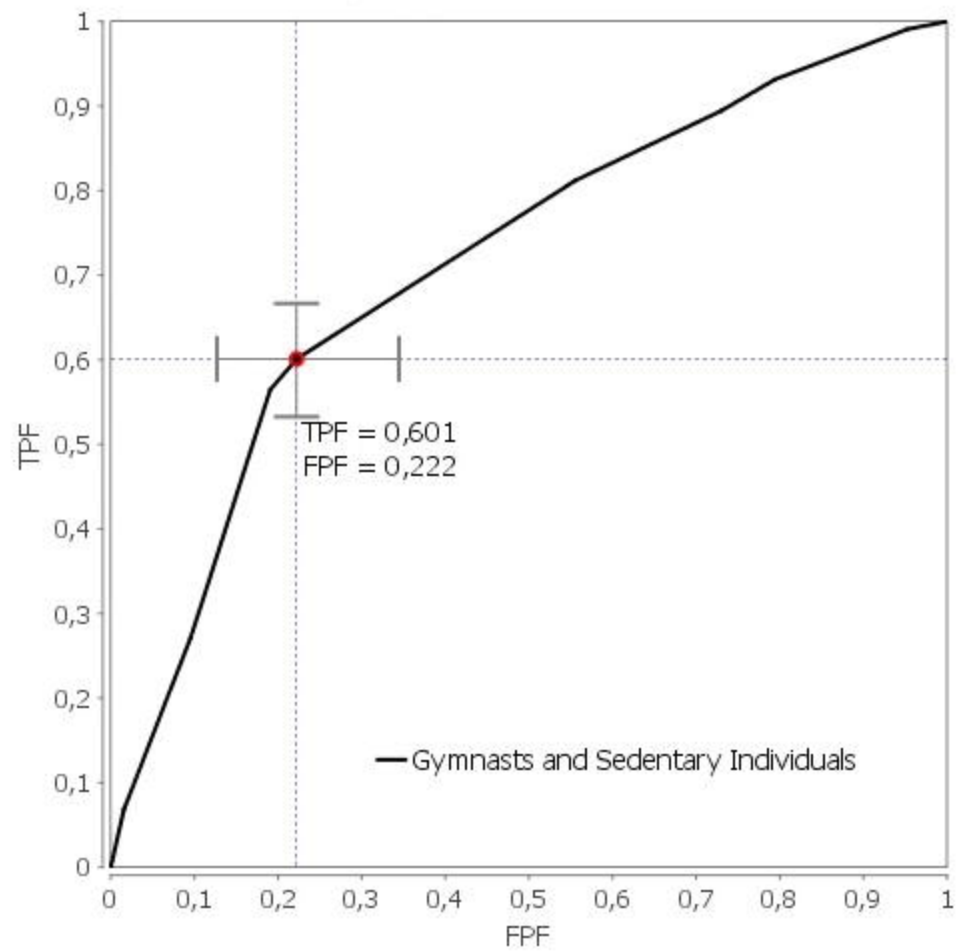

Source: https://www.biorxiv.org/content/10.1101/2020.04.25.060020v1.full.pdf
